# Supplementary material for: Engineering microscale systems for fully autonomous intracellular neural interfaces
Source: PubMed Central journal article supplement (PMC8433365; doi:10.1038/s41378-019-0121-y), 2020-02-10
Supplement: 41378_2019_121_MOESM1_ESM.pdf [file 41378_2019_121_MOESM1_ESM.pdf]

A

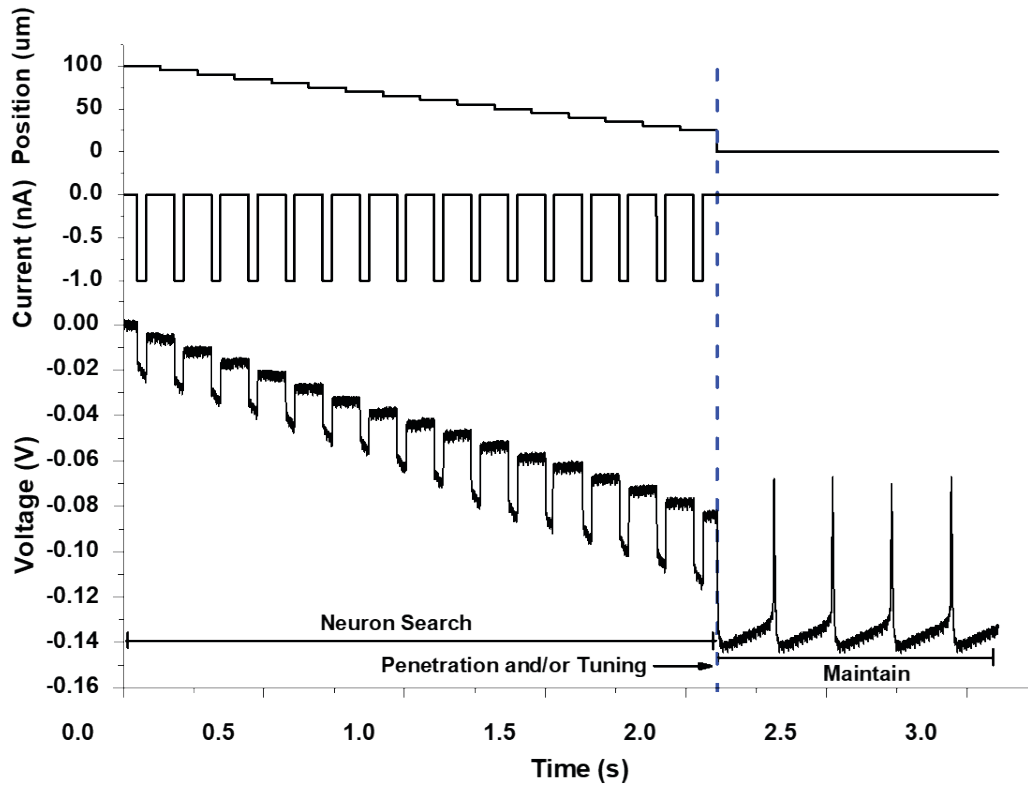

B

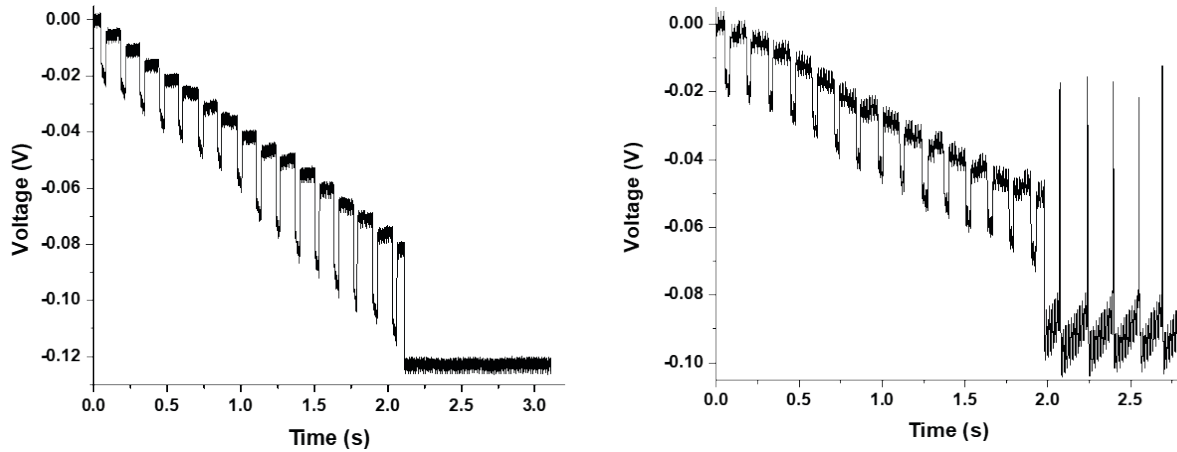

**Supplementary Fig.1:** Validation of the closed-loop control after integration of controller with a GP microelectrode and a conventional hydraulic microdrive. (A) Illustration of a typical trial of the closed loop control - the controller moved the electrode using the microdrive in steps of  $5 \mu\text{m}$  towards a neuron in the isolated abdominal ganglion, until the electrical impedance of the tip was above the threshold value of  $8 \text{ M}\Omega$ , beyond which the controller switched to the 'Penetration and/or Tuning' mode to impale the neuron and obtained intracellular recordings. (B) Representative plots showing performance of the controller in 2 additional neurons with good quality resting potentials (RP) and/or action potentials (AP).
